# Supplementary material for: Correlation Between IgA Levels in Henoch–Schönlein Purpura and a Medical History of Infectious Disease in the Pediatric Population: A Five-Year Retrospective Analysis
Source: Preprints.org preprint supplement (doi:10.20944/preprints202409.1873.v1), 2024-09-24
Supplement: Supplementary file 1 [file supplementary]

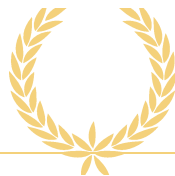

We certify that the following article

Correlation between IgA levels in Henoch Schönlein purpura and medical history of infectious disease in pediatric population: a five-year retrospective analysis

Gabriela Viorela Nitescu

has undergone English language editing by MDPI. The text has been checked for correct use of grammar and common technical terms, and edited to a level suitable for reporting research in a scholarly journal.

MDPI uses experienced, native English speaking editors. Full details of the editing service can be found at  
► <https://www.mdpi.com/authors/english>.

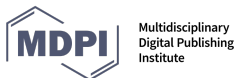

Basel, Switzerland  
August 2024

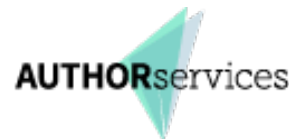

english-84393
